# Supplementary material
Source: PubMed Central journal article supplement (PMC1852250)
Supplement: blood_blood-2006-06-032250_1.pdf [file blood_blood-2006-06-032250_1.pdf]

| <b>Assays</b>            | <b>Primer sets</b>        | <b>Forward primer</b>                 | <b>Reverse primer</b>                 |
|--------------------------|---------------------------|---------------------------------------|---------------------------------------|
| Semi-quantitative RT-PCR | AE                        | CTGGCGCTGCAACAAGACC                   | AGCCTGAATGACTACTTACA C                |
|                          | Bcl-2                     | ACTTGTGGCCCAGATAGGCACCCAG             | CGACTTCGCCGAGATGTCCAGCCAG             |
|                          | G-CSFR                    | CCTGGAGCTGAGAACTACCG                  | TCCCGGCTGAGTTATAGG                    |
|                          | MPO                       | ATATCAGGTGGGCTGTGGAG                  | ATCTTCCGGGCTTCCTGGTA                  |
|                          | IL-3                      | ATGGGGAAGACCAAGACATT                  | TTCTCAAGGGTTTTTCAGATAG                |
|                          | GM-CSF                    | CGGCGTCTCCTGAACCTG                    | CTTCTGCCATGCCTGTAT                    |
|                          | G3-PDH                    | TGAAGGTCGGAGTCAACGGATTTGGT            | CATGTGGGCCATGAGGTCCACCAC              |
| Quantitative RT-PCR      | AE                        | CACAAACCCACCGCAAGTC                   | TGGAGTGCTTCTCAGTACGATTTTC             |
|                          | Bcl-2                     | ATGTGTGTGGAGAGCGTCAACC                | TGAGCAGAGTCTTCAGAGACAGCC              |
|                          | G-CSFR                    | CTGGAGGATGGAACAGAATG                  | GAAGATGGTGAGTGGGTAAGG                 |
|                          | MPO                       | CTCCCGCAGCCTGAAACT                    | CCTCGTTCTCCCACCAAAA                   |
|                          | IL-3                      | TTAAAGCAGCCACCTTTGCC                  | TTGAATGCCTCCAGGTTTGG                  |
|                          | GM-CSF                    | CAGCCACTACAAGCAGCACT                  | AAAGGGGATGACAAGCAGAA                  |
|                          | $\beta$ -actin            | CTCCTCCTGAGCGCAAGTACTC                | TCCTGCTTGCTGATCCACATC                 |
| ChIP                     | IL-3 promoter             | GCTGCCATGCTTCCCATCT                   | CAACAACCTCCCGCCTTAT                   |
|                          | GM-CSF promoter           | GAGATTCCACAGTTCAGGTAG                 | ATGGCATTACATGCTCCC                    |
|                          | Bcl-2 promoter            | GACCAGGAGGAGGAGAAAGG                  | GATAAATGAAGGCAGGACGC                  |
|                          | MPO promoter              | CTCCCCAGCTTCCATAGCCT                  | GTCCCAAATATCCCCACCC                   |
|                          | Site-directed mutagenesis | D171A                                 | CAAATCACAGTGGCCGGGCCCGAG<br>AACC      |
| D188A                    |                           | ACTCCACAATGCCAGCCTCACCTGTG<br>GATG    | CATCCACAGGTGAGGCTGGCATTGTGG<br>AGT    |
| D192A                    |                           | CCAGACTCACCTGTGGCCGTGAAGAC<br>GCAATCT | AGATTGCGTCTTCACGGCCACAGGTGA<br>GTCTGG |
