# Supplementary material
Source: PubMed Central journal article supplement (PMC1852250)
Supplement: blood_blood-2006-06-032250_2.pdf [file blood_blood-2006-06-032250_2.pdf]

---

| Leukemia subtypes       | Patient numbers | Annexin V positive cells (%)<br>(mean±SD) |
|-------------------------|-----------------|-------------------------------------------|
| AML M2 with t(8; 21)    | 5               | 77.2±20.6                                 |
| AML M2 without t(8; 21) | 3               | 44.7±16.3                                 |
| AML M3 with t(15; 17)   | 3               | 36.2±10.5                                 |
| AML M5                  | 2               | 40.5±5.9                                  |
| CML                     | 3               | 27.8±6.4                                  |

---
